# Supplementary material for: Vulnerability for new episodes in recurrent major depressive disorder: protocol for the longitudinal DELTA-neuroimaging cohort study
Source: PubMed Central journal article supplement — BMJ Open. 2016 Mar 1;6(3):e009510. doi: 10.1136/bmjopen-2015-009510 (PMC4785288; doi:10.1136/bmjopen-2015-009510), 2016-03-01
Supplement: bmjopen-2015-008721supp_table1.pdf [file bmjopen-2015-008721supp_table1.pdf]

| morning        |                    | Question (Dutch)                                                    | Translation                                                              | Value Label                                                                                                                                                                                                                                                                                                                                                                                                                                                                                                                                                                                                                                                                                                                                                                                                                                                                                                                                                                                                                                                                                                       | Translation value Label                                                                                                                                                                                                                                                                                                                                                                                                                                                                                                                                     |
|----------------|--------------------|---------------------------------------------------------------------|--------------------------------------------------------------------------|-------------------------------------------------------------------------------------------------------------------------------------------------------------------------------------------------------------------------------------------------------------------------------------------------------------------------------------------------------------------------------------------------------------------------------------------------------------------------------------------------------------------------------------------------------------------------------------------------------------------------------------------------------------------------------------------------------------------------------------------------------------------------------------------------------------------------------------------------------------------------------------------------------------------------------------------------------------------------------------------------------------------------------------------------------------------------------------------------------------------|-------------------------------------------------------------------------------------------------------------------------------------------------------------------------------------------------------------------------------------------------------------------------------------------------------------------------------------------------------------------------------------------------------------------------------------------------------------------------------------------------------------------------------------------------------------|
| SeqNo          | FieldName          | HOE LANG GELIJD HET VOORDAT IK GISTERAVOND INSLIEP?                 | How long did it take before I fell asleep last night?                    | 1=0-5min<cr>2=5-15min<cr>3=15-30min<cr>4=30-45min<cr>5=45m-1u<cr>6=1-2uur<cr>7=2-4uur<cr>8=>4uur                                                                                                                                                                                                                                                                                                                                                                                                                                                                                                                                                                                                                                                                                                                                                                                                                                                                                                                                                                                                                  | 1=0-5min<cr>2=5-15min<cr>3=15-30min<cr>4=30-45min<cr>5=45m-1hr<cr>6=1-2hrs<cr>7=2-4hrs<cr>8=>4hrs                                                                                                                                                                                                                                                                                                                                                                                                                                                           |
| 1              | mor_asleep         | HOE VAAK WERD IK AFGELOPEN NACHT WAKKER?                            | How often did I wake up last night?                                      | 1 - >5                                                                                                                                                                                                                                                                                                                                                                                                                                                                                                                                                                                                                                                                                                                                                                                                                                                                                                                                                                                                                                                                                                            | 1 - >5                                                                                                                                                                                                                                                                                                                                                                                                                                                                                                                                                      |
| 2              | mor_wakeup         | HOE LANG LAG IK VANMORGEN WAKKER VOORDAT IK OPSTOND?                | How long did I lay awake in bed before I got up this morning?            | 1=0-5min<cr>2=5-15min<cr>3=15-30min<cr>4=30-45min<cr>5=45m-1u<cr>6=1-2uur<cr>7=2-4uur<cr>8=>4uur                                                                                                                                                                                                                                                                                                                                                                                                                                                                                                                                                                                                                                                                                                                                                                                                                                                                                                                                                                                                                  | 1=0-5min<cr>2=5-15min<cr>3=15-30min<cr>4=30-45min<cr>5=45m-1hr<cr>6=1-2hrs<cr>7=2-4hrs<cr>8=>4hrs                                                                                                                                                                                                                                                                                                                                                                                                                                                           |
| 3              | mor_leawake        | IK HEB GEEN GESLAPEN                                                | I slept well                                                             | Likert scale                                                                                                                                                                                                                                                                                                                                                                                                                                                                                                                                                                                                                                                                                                                                                                                                                                                                                                                                                                                                                                                                                                      | Likert scale                                                                                                                                                                                                                                                                                                                                                                                                                                                                                                                                                |
| 4              | mor_quiesleep      | IK HEB ZIN IN DEZE DAG                                              | I am looking forward to this day                                         | Likert scale                                                                                                                                                                                                                                                                                                                                                                                                                                                                                                                                                                                                                                                                                                                                                                                                                                                                                                                                                                                                                                                                                                      | Likert scale                                                                                                                                                                                                                                                                                                                                                                                                                                                                                                                                                |
| 5              | mor_lookforw       | IK HEB ZIN OM ME LICHAMELIJK IN TE SPANNEN                          | I am looking forward to being physically active                          | Likert scale                                                                                                                                                                                                                                                                                                                                                                                                                                                                                                                                                                                                                                                                                                                                                                                                                                                                                                                                                                                                                                                                                                      | Likert scale                                                                                                                                                                                                                                                                                                                                                                                                                                                                                                                                                |
| 6              | MOR_Phy_Fexec      | IK HEB ZIN ETS LUKS TE GAAN DOEN VANDAAG                            | I am looking forward to doing something nice today                       | Likert scale                                                                                                                                                                                                                                                                                                                                                                                                                                                                                                                                                                                                                                                                                                                                                                                                                                                                                                                                                                                                                                                                                                      | Likert scale                                                                                                                                                                                                                                                                                                                                                                                                                                                                                                                                                |
| 7              | MOR_Fun_Act        | IK HEB ZIN OM MET VRIENDEN TE ZIJN VANDAAG                          | I am looking forward to being with friends today                         | Likert scale                                                                                                                                                                                                                                                                                                                                                                                                                                                                                                                                                                                                                                                                                                                                                                                                                                                                                                                                                                                                                                                                                                      | Likert scale                                                                                                                                                                                                                                                                                                                                                                                                                                                                                                                                                |
| 8              | MOR_Friends        | IK GA VANDAAG WERKEN/STUDEREN                                       | I am going to work/study today                                           | Likert scale                                                                                                                                                                                                                                                                                                                                                                                                                                                                                                                                                                                                                                                                                                                                                                                                                                                                                                                                                                                                                                                                                                      | Likert scale                                                                                                                                                                                                                                                                                                                                                                                                                                                                                                                                                |
| 9              | MOR_Work           | IK HEB ZIN OM TE GAAN WERKEN/STUDEREN                               | I am looking forward to working/studying today                           | Likert scale                                                                                                                                                                                                                                                                                                                                                                                                                                                                                                                                                                                                                                                                                                                                                                                                                                                                                                                                                                                                                                                                                                      | Likert scale                                                                                                                                                                                                                                                                                                                                                                                                                                                                                                                                                |
| 10             | MOR_Enjoy_Work     |                                                                     |                                                                          |                                                                                                                                                                                                                                                                                                                                                                                                                                                                                                                                                                                                                                                                                                                                                                                                                                                                                                                                                                                                                                                                                                                   |                                                                                                                                                                                                                                                                                                                                                                                                                                                                                                                                                             |
| <b>beep</b>    |                    |                                                                     |                                                                          |                                                                                                                                                                                                                                                                                                                                                                                                                                                                                                                                                                                                                                                                                                                                                                                                                                                                                                                                                                                                                                                                                                                   |                                                                                                                                                                                                                                                                                                                                                                                                                                                                                                                                                             |
| SeqNo          | FieldName          | Question (Dutch)                                                    | Translation                                                              | Value Label                                                                                                                                                                                                                                                                                                                                                                                                                                                                                                                                                                                                                                                                                                                                                                                                                                                                                                                                                                                                                                                                                                       | Translation value Label                                                                                                                                                                                                                                                                                                                                                                                                                                                                                                                                     |
| 1              | mood_relaxed       | IK VOEL ME ONTSPANNEN                                               | I feel relaxed                                                           | Likert scale                                                                                                                                                                                                                                                                                                                                                                                                                                                                                                                                                                                                                                                                                                                                                                                                                                                                                                                                                                                                                                                                                                      | Likert scale                                                                                                                                                                                                                                                                                                                                                                                                                                                                                                                                                |
| 2              | mood_down          | IK VOEL ME SOMBER                                                   | I feel down                                                              | Likert scale                                                                                                                                                                                                                                                                                                                                                                                                                                                                                                                                                                                                                                                                                                                                                                                                                                                                                                                                                                                                                                                                                                      | Likert scale                                                                                                                                                                                                                                                                                                                                                                                                                                                                                                                                                |
| 3              | Mood_irritat       | IK VOEL ME GERRITTEERD                                              | I feel irritated                                                         | Likert scale                                                                                                                                                                                                                                                                                                                                                                                                                                                                                                                                                                                                                                                                                                                                                                                                                                                                                                                                                                                                                                                                                                      | Likert scale                                                                                                                                                                                                                                                                                                                                                                                                                                                                                                                                                |
| 4              | mood_satisf        | IK VOEL ME TEVREDEN                                                 | I feel satisfied                                                         | Likert scale                                                                                                                                                                                                                                                                                                                                                                                                                                                                                                                                                                                                                                                                                                                                                                                                                                                                                                                                                                                                                                                                                                      | Likert scale                                                                                                                                                                                                                                                                                                                                                                                                                                                                                                                                                |
| 5              | mood_lonely        | IK VOEL ME EENZAAM                                                  | I feel lonely                                                            | Likert scale                                                                                                                                                                                                                                                                                                                                                                                                                                                                                                                                                                                                                                                                                                                                                                                                                                                                                                                                                                                                                                                                                                      | Likert scale                                                                                                                                                                                                                                                                                                                                                                                                                                                                                                                                                |
| 6              | mood_anxious       | IK VOEL ME ANGSTIG                                                  | I feel anxious                                                           | Likert scale                                                                                                                                                                                                                                                                                                                                                                                                                                                                                                                                                                                                                                                                                                                                                                                                                                                                                                                                                                                                                                                                                                      | Likert scale                                                                                                                                                                                                                                                                                                                                                                                                                                                                                                                                                |
| 7              | mood_enthus        | IK VOEL ME ENTHOUSIAST                                              | I feel enthusiastic                                                      | Likert scale                                                                                                                                                                                                                                                                                                                                                                                                                                                                                                                                                                                                                                                                                                                                                                                                                                                                                                                                                                                                                                                                                                      | Likert scale                                                                                                                                                                                                                                                                                                                                                                                                                                                                                                                                                |
| 8              | pat_susp           | IK VOEL ME WANTSIGWAAS                                              | I feel suspicious                                                        | Likert scale                                                                                                                                                                                                                                                                                                                                                                                                                                                                                                                                                                                                                                                                                                                                                                                                                                                                                                                                                                                                                                                                                                      | Likert scale                                                                                                                                                                                                                                                                                                                                                                                                                                                                                                                                                |
| 9              | mood_cheerf        | IK VOEL ME OPGEWKWT                                                 | I feel cheerful                                                          | Likert scale                                                                                                                                                                                                                                                                                                                                                                                                                                                                                                                                                                                                                                                                                                                                                                                                                                                                                                                                                                                                                                                                                                      | Likert scale                                                                                                                                                                                                                                                                                                                                                                                                                                                                                                                                                |
| 10             | mood_guilt         | IK VOEL ME SCHULDIG                                                 | I feel guilty                                                            | Likert scale                                                                                                                                                                                                                                                                                                                                                                                                                                                                                                                                                                                                                                                                                                                                                                                                                                                                                                                                                                                                                                                                                                      | Likert scale                                                                                                                                                                                                                                                                                                                                                                                                                                                                                                                                                |
| 11             | mood_enid          | IK VOEL ME RUSTELOOS                                                | I feel restless                                                          | Likert scale                                                                                                                                                                                                                                                                                                                                                                                                                                                                                                                                                                                                                                                                                                                                                                                                                                                                                                                                                                                                                                                                                                      | Likert scale                                                                                                                                                                                                                                                                                                                                                                                                                                                                                                                                                |
| 12             | mood_agitate       | IK VOEL ME PRIKELBAAR                                               | I feel agitated                                                          | Likert scale                                                                                                                                                                                                                                                                                                                                                                                                                                                                                                                                                                                                                                                                                                                                                                                                                                                                                                                                                                                                                                                                                                      | Likert scale                                                                                                                                                                                                                                                                                                                                                                                                                                                                                                                                                |
| 13             | thou_worry         | IK FIKER                                                            | I am worrying                                                            | Likert scale                                                                                                                                                                                                                                                                                                                                                                                                                                                                                                                                                                                                                                                                                                                                                                                                                                                                                                                                                                                                                                                                                                      | Likert scale                                                                                                                                                                                                                                                                                                                                                                                                                                                                                                                                                |
| 14             | ie_suffice         | IK MAG MEZELF                                                       | I like myself                                                            | Likert scale                                                                                                                                                                                                                                                                                                                                                                                                                                                                                                                                                                                                                                                                                                                                                                                                                                                                                                                                                                                                                                                                                                      | Likert scale                                                                                                                                                                                                                                                                                                                                                                                                                                                                                                                                                |
| 15             | se_ashamed         | IK SCHAAM ME VOOR MEZELF                                            | I feel ashamed for myself                                                | Likert scale                                                                                                                                                                                                                                                                                                                                                                                                                                                                                                                                                                                                                                                                                                                                                                                                                                                                                                                                                                                                                                                                                                      | Likert scale                                                                                                                                                                                                                                                                                                                                                                                                                                                                                                                                                |
| 16             | se_selfdoub        | IK TWIFEL AAN MEZELF                                                | I doubt myself                                                           | Likert scale                                                                                                                                                                                                                                                                                                                                                                                                                                                                                                                                                                                                                                                                                                                                                                                                                                                                                                                                                                                                                                                                                                      | Likert scale                                                                                                                                                                                                                                                                                                                                                                                                                                                                                                                                                |
| 17             | pat_handle         | IK KAN ALLES AAN                                                    | I can handle anything                                                    | Likert scale                                                                                                                                                                                                                                                                                                                                                                                                                                                                                                                                                                                                                                                                                                                                                                                                                                                                                                                                                                                                                                                                                                      | Likert scale                                                                                                                                                                                                                                                                                                                                                                                                                                                                                                                                                |
| 18             | soc_who1           | MET WIE BEN IK?                                                     | With whom am I?                                                          | 10=partner<cr>19=inwonenden<cr>29=familie uitwonend<cr>30=vrinden<cr>40=collega's<cr>49=kennissen<cr>50=onbekenden/vranderen<cr>00=niemand                                                                                                                                                                                                                                                                                                                                                                                                                                                                                                                                                                                                                                                                                                                                                                                                                                                                                                                                                                        | 10=partner<cr>19=inwonenden<cr>29=familie uitwonend<cr>30=vrinden<cr>40=collega's<cr>49=kennissen<cr>50=onbekenden/vranderen<cr>00=niemand                                                                                                                                                                                                                                                                                                                                                                                                                  |
| 19             | soc_enjoy_alone    | IK WIND HET AANGENAAM OM ALLEEN TE ZIJN                             | I enjoy being alone                                                      | Likert scale                                                                                                                                                                                                                                                                                                                                                                                                                                                                                                                                                                                                                                                                                                                                                                                                                                                                                                                                                                                                                                                                                                      | Likert scale                                                                                                                                                                                                                                                                                                                                                                                                                                                                                                                                                |
| 20             | soc_grefcomp       | IK ZOU LIEVER IN GEZELLSCHAP ZIJN                                   | I would prefer to have company                                           | Likert scale                                                                                                                                                                                                                                                                                                                                                                                                                                                                                                                                                                                                                                                                                                                                                                                                                                                                                                                                                                                                                                                                                                      | Likert scale                                                                                                                                                                                                                                                                                                                                                                                                                                                                                                                                                |
| 21             | soc_who2           | MET WIE BEN IK NOG MEER?                                            | With whom else am I?                                                     | 10=partner<cr>19=inwonenden<cr>29=familie uitwonend<cr>30=vrinden<cr>40=collega's<cr>49=kennissen<cr>50=onbekenden/vranderen<cr>00=niemand<cr>10=partner<cr>19=inwonenden<cr>29=familie uitwonend<cr>30=vrinden<cr>40=collega's<cr>49=kennissen<cr>50=onbekenden/vranderen<cr>00=niemand                                                                                                                                                                                                                                                                                                                                                                                                                                                                                                                                                                                                                                                                                                                                                                                                                          | 10=partner<cr>19=inwonenden<cr>29=familie uitwonend<cr>30=vrinden<cr>40=collega's<cr>49=kennissen<cr>50=onbekenden/vranderen<cr>00=niemand<cr>10=partner<cr>19=inwonenden<cr>29=familie uitwonend<cr>30=vrinden<cr>40=collega's<cr>49=kennissen<cr>50=onbekenden/vranderen<cr>00=niemand                                                                                                                                                                                                                                                                    |
| 22             | soc_who3           | EN...?                                                              | And...?                                                                  | 1 - >6                                                                                                                                                                                                                                                                                                                                                                                                                                                                                                                                                                                                                                                                                                                                                                                                                                                                                                                                                                                                                                                                                                            | 1 - >6                                                                                                                                                                                                                                                                                                                                                                                                                                                                                                                                                      |
| 23             | soc_rntot          | MET HOEVEEL MENSEN BEN IK?                                          | With how many people am I?                                               | Likert scale                                                                                                                                                                                                                                                                                                                                                                                                                                                                                                                                                                                                                                                                                                                                                                                                                                                                                                                                                                                                                                                                                                      | Likert scale                                                                                                                                                                                                                                                                                                                                                                                                                                                                                                                                                |
| 24             | soc_pleasant       | IK WIND DIT GEZELLSCHAP AANGENAAM                                   | I find this company pleasant                                             | Likert scale                                                                                                                                                                                                                                                                                                                                                                                                                                                                                                                                                                                                                                                                                                                                                                                                                                                                                                                                                                                                                                                                                                      | Likert scale                                                                                                                                                                                                                                                                                                                                                                                                                                                                                                                                                |
| 25             | soc_preflon        | IK ZOU LIEVER ALLEEN ZIJN                                           | I would prefer to be alone                                               | Likert scale                                                                                                                                                                                                                                                                                                                                                                                                                                                                                                                                                                                                                                                                                                                                                                                                                                                                                                                                                                                                                                                                                                      | Likert scale                                                                                                                                                                                                                                                                                                                                                                                                                                                                                                                                                |
| 26             | soc_interact       | WE ZIJN SAMEN IETS AAN HET DOEN                                     | We are doing something together                                          | Likert scale                                                                                                                                                                                                                                                                                                                                                                                                                                                                                                                                                                                                                                                                                                                                                                                                                                                                                                                                                                                                                                                                                                      | Likert scale                                                                                                                                                                                                                                                                                                                                                                                                                                                                                                                                                |
| 27             | phy_hungry         | IK HEB HONGER                                                       | I am hungry                                                              | Likert scale                                                                                                                                                                                                                                                                                                                                                                                                                                                                                                                                                                                                                                                                                                                                                                                                                                                                                                                                                                                                                                                                                                      | Likert scale                                                                                                                                                                                                                                                                                                                                                                                                                                                                                                                                                |
| 28             | phy_tired          | IK BEN MOE                                                          | I am tired                                                               | Likert scale                                                                                                                                                                                                                                                                                                                                                                                                                                                                                                                                                                                                                                                                                                                                                                                                                                                                                                                                                                                                                                                                                                      | Likert scale                                                                                                                                                                                                                                                                                                                                                                                                                                                                                                                                                |
| 29             | phy_pain           | IK HEB PIJN                                                         | I am having pain                                                         | Likert scale                                                                                                                                                                                                                                                                                                                                                                                                                                                                                                                                                                                                                                                                                                                                                                                                                                                                                                                                                                                                                                                                                                      | Likert scale                                                                                                                                                                                                                                                                                                                                                                                                                                                                                                                                                |
| 30             | phy_dizzy          | IK VOEL ME DUZELIG                                                  | I feel dizzy                                                             | Likert scale                                                                                                                                                                                                                                                                                                                                                                                                                                                                                                                                                                                                                                                                                                                                                                                                                                                                                                                                                                                                                                                                                                      | Likert scale                                                                                                                                                                                                                                                                                                                                                                                                                                                                                                                                                |
| 31             | phy_drymouth       | IK HEB EEN DROGE MOND                                               | I have a dry mouth                                                       | Likert scale                                                                                                                                                                                                                                                                                                                                                                                                                                                                                                                                                                                                                                                                                                                                                                                                                                                                                                                                                                                                                                                                                                      | Likert scale                                                                                                                                                                                                                                                                                                                                                                                                                                                                                                                                                |
| 32             | phy_nauseous       | IK VOEL ME MISSELIG                                                 | I feel nauseous                                                          | Likert scale                                                                                                                                                                                                                                                                                                                                                                                                                                                                                                                                                                                                                                                                                                                                                                                                                                                                                                                                                                                                                                                                                                      | Likert scale                                                                                                                                                                                                                                                                                                                                                                                                                                                                                                                                                |
| 33             | act_what1          | WAT DOE IK? (Vlak voor de piep)? Dit past in de volgende categorie: | What do I do (just before the beep)? This fits in the next category:     | 43=ontspanning/vactief<cr>45=ontspanning/vpassief<cr>00=niets/rusten<cr>10=werk/studie<cr>21=huishouden<cr>51=praten<cr>27=zelfverzorging<cr>21=zorg voor anderen<cr>26=medische zorg<cr>60=eten/drinken<cr>88=onderweg<cr>89=anders                                                                                                                                                                                                                                                                                                                                                                                                                                                                                                                                                                                                                                                                                                                                                                                                                                                                              | 43=ontspanning/vactief<cr>45=ontspanning/vpassief<cr>00=niets/rusten<cr>10=werk/studie<cr>21=huishouden<cr>51=praten<cr>27=zelfverzorging<cr>21=zorg voor anderen<cr>26=medische zorg<cr>60=eten/drinken<cr>88=onderweg<cr>89=anders                                                                                                                                                                                                                                                                                                                        |
| 34             | act_what2          | EN DAARNAAST ...?                                                   | And what else...?                                                        | Likert scale                                                                                                                                                                                                                                                                                                                                                                                                                                                                                                                                                                                                                                                                                                                                                                                                                                                                                                                                                                                                                                                                                                      | Likert scale                                                                                                                                                                                                                                                                                                                                                                                                                                                                                                                                                |
| 35             | act_difficul       | DIT KOST MI MOEITE                                                  | This is difficult to me                                                  | Likert scale                                                                                                                                                                                                                                                                                                                                                                                                                                                                                                                                                                                                                                                                                                                                                                                                                                                                                                                                                                                                                                                                                                      | Likert scale                                                                                                                                                                                                                                                                                                                                                                                                                                                                                                                                                |
| 36             | act_well           | DIT KAN IK GOED                                                     | This I can do well                                                       | Likert scale                                                                                                                                                                                                                                                                                                                                                                                                                                                                                                                                                                                                                                                                                                                                                                                                                                                                                                                                                                                                                                                                                                      | Likert scale                                                                                                                                                                                                                                                                                                                                                                                                                                                                                                                                                |
| 37             | act_else           | IK ZOU LIEVER WAT ANDERS DOEN                                       | I would prefer to do something else                                      | Likert scale                                                                                                                                                                                                                                                                                                                                                                                                                                                                                                                                                                                                                                                                                                                                                                                                                                                                                                                                                                                                                                                                                                      | Likert scale                                                                                                                                                                                                                                                                                                                                                                                                                                                                                                                                                |
| 38             | phy_physact        | SINDE DE VORIGE PIEP HEB IK ME LICHAMELIJK INGESPANNEN              | Since the last beep I have been physically active                        | Likert scale                                                                                                                                                                                                                                                                                                                                                                                                                                                                                                                                                                                                                                                                                                                                                                                                                                                                                                                                                                                                                                                                                                      | Likert scale                                                                                                                                                                                                                                                                                                                                                                                                                                                                                                                                                |
| 39             | eve_event          | DENK AAN DE VOOR JOU BELANGRIJKSTE GEBEURTENIS SINDE DE VORIGE PIEP | Think about the event that was most important to you since the last beep | 1=>>><cr>-3=zeer onplezierig<cr>3=zeer plezierig<cr>-3=zeer onbelangrijk<cr>3=zeer belangrijk<cr>1=iets wat me overkomen is<cr>2=iets waar ik zelf invloed op had<cr>3=iets regelmatig of routine<cr>4=een gedachte/voe<cr>5=anders<cr>1=contact met anderen<cr>2=de omgeving waarin ik was<cr>3=eigen gesteldheid<cr>4=activiteit<cr>5=nieuwe informatie<cr>6=anders<cr>1=veaker per dag<cr>2=dagelijks<cr>3=wekelijks<cr>4=maandelijks<cr>1=andere<cr>2=mezelf<cr>3=concrete dingen<cr>4=activiteit<cr>5=iets abstract<cr>6=onbekend<cr>7=anders<cr>1=>>><cr>-3=zeer onplezierig<cr>3=zeer plezierig<cr>-3=zeer onbelangrijk<cr>3=zeer belangrijk<cr>1=iets wat me overkomen is<cr>2=iets waar ik zelf invloed op had<cr>3=iets regelmatig of routine<cr>4=een gedachte/voe<cr>5=anders<cr>1=contact met anderen<cr>2=de omgeving waarin ik was<cr>3=eigen gesteldheid<cr>4=activiteit<cr>5=nieuwe informatie<cr>6=anders<cr>1=veaker per dag<cr>2=dagelijks<cr>3=wekelijks<cr>4=maandelijks<cr>1=andere<cr>2=mezelf<cr>3=concrete dingen<cr>4=activiteit<cr>5=iets abstract<cr>6=onbekend<cr>7=anders<cr>1=>>> | 1=>>><cr>-3=zeer onplezierig<cr>3=zeer plezierig<cr>-3=zeer onbelangrijk<cr>3=zeer belangrijk<cr>1=iets wat me overkomen is<cr>2=iets waar ik zelf invloed op had<cr>3=iets regelmatig of routine<cr>4=een gedachte/voe<cr>5=anders<cr>1=contact met anderen<cr>2=de omgeving waarin ik was<cr>3=eigen gesteldheid<cr>4=activiteit<cr>5=nieuwe informatie<cr>6=anders<cr>1=veaker per dag<cr>2=dagelijks<cr>3=wekelijks<cr>4=maandelijks<cr>1=andere<cr>2=mezelf<cr>3=concrete dingen<cr>4=activiteit<cr>5=iets abstract<cr>6=onbekend<cr>7=anders<cr>1=>>> |
| 40             | eve_unpleas        | DEZE GEBEURTENIS WAS:                                               | This event was:                                                          | Likert scale                                                                                                                                                                                                                                                                                                                                                                                                                                                                                                                                                                                                                                                                                                                                                                                                                                                                                                                                                                                                                                                                                                      | Likert scale                                                                                                                                                                                                                                                                                                                                                                                                                                                                                                                                                |
| 41             | eve_important      | DEZE GEBEURTENIS WAS:                                               | This event was:                                                          | Likert scale                                                                                                                                                                                                                                                                                                                                                                                                                                                                                                                                                                                                                                                                                                                                                                                                                                                                                                                                                                                                                                                                                                      | Likert scale                                                                                                                                                                                                                                                                                                                                                                                                                                                                                                                                                |
| 42             | eve_retro          | DEZE GEBEURTENIS WAS:                                               | This event was:                                                          | Likert scale                                                                                                                                                                                                                                                                                                                                                                                                                                                                                                                                                                                                                                                                                                                                                                                                                                                                                                                                                                                                                                                                                                      | Likert scale                                                                                                                                                                                                                                                                                                                                                                                                                                                                                                                                                |
| 43             | eve_content3       | DIT HAD VOORAL TE MAKEN MET:                                        | This event had to do with:                                               | Likert scale                                                                                                                                                                                                                                                                                                                                                                                                                                                                                                                                                                                                                                                                                                                                                                                                                                                                                                                                                                                                                                                                                                      | Likert scale                                                                                                                                                                                                                                                                                                                                                                                                                                                                                                                                                |
| 44             | eve_specify2       | DIT GEBEURT GEWOONLUC:                                              | This usually happens:                                                    | Likert scale                                                                                                                                                                                                                                                                                                                                                                                                                                                                                                                                                                                                                                                                                                                                                                                                                                                                                                                                                                                                                                                                                                      | Likert scale                                                                                                                                                                                                                                                                                                                                                                                                                                                                                                                                                |
| 45             | eve_specify3       | DIT HAD BETREKING TOT:                                              | This was related to:                                                     | Likert scale                                                                                                                                                                                                                                                                                                                                                                                                                                                                                                                                                                                                                                                                                                                                                                                                                                                                                                                                                                                                                                                                                                      | Likert scale                                                                                                                                                                                                                                                                                                                                                                                                                                                                                                                                                |
| 46             | Event_anticipation | BEDENK WAT JE DE KOMENDE TWEE UUR GAAT DOEN                         | Think about what you are going to do in the next two hours               | Likert scale                                                                                                                                                                                                                                                                                                                                                                                                                                                                                                                                                                                                                                                                                                                                                                                                                                                                                                                                                                                                                                                                                                      | Likert scale                                                                                                                                                                                                                                                                                                                                                                                                                                                                                                                                                |
| 47             | Event_like         | HOEVEEL ZIN HEB IK HIERIN?                                          | How much are you looking forward to this event?                          | Likert scale                                                                                                                                                                                                                                                                                                                                                                                                                                                                                                                                                                                                                                                                                                                                                                                                                                                                                                                                                                                                                                                                                                      | Likert scale                                                                                                                                                                                                                                                                                                                                                                                                                                                                                                                                                |
| 48             | Event_Cat          | DEZE ACTIVITEIT PAST IN DE VOLGENDE CATEGORIE:                      | This event fits in the next category:                                    | Likert scale                                                                                                                                                                                                                                                                                                                                                                                                                                                                                                                                                                                                                                                                                                                                                                                                                                                                                                                                                                                                                                                                                                      | Likert scale                                                                                                                                                                                                                                                                                                                                                                                                                                                                                                                                                |
| 49             | beep_disturb       | DEZE PIEP STOORDE MI                                                | This beep disturbed me                                                   | Likert scale                                                                                                                                                                                                                                                                                                                                                                                                                                                                                                                                                                                                                                                                                                                                                                                                                                                                                                                                                                                                                                                                                                      | Likert scale                                                                                                                                                                                                                                                                                                                                                                                                                                                                                                                                                |
| 50             | REMOO_BES0         | BEDANKT                                                             | Thank you                                                                | Likert scale                                                                                                                                                                                                                                                                                                                                                                                                                                                                                                                                                                                                                                                                                                                                                                                                                                                                                                                                                                                                                                                                                                      | Likert scale                                                                                                                                                                                                                                                                                                                                                                                                                                                                                                                                                |
| <b>evening</b> |                    |                                                                     |                                                                          |                                                                                                                                                                                                                                                                                                                                                                                                                                                                                                                                                                                                                                                                                                                                                                                                                                                                                                                                                                                                                                                                                                                   |                                                                                                                                                                                                                                                                                                                                                                                                                                                                                                                                                             |
| SeqNo          | FieldName          | Question (Dutch)                                                    | Translation                                                              | Value Label                                                                                                                                                                                                                                                                                                                                                                                                                                                                                                                                                                                                                                                                                                                                                                                                                                                                                                                                                                                                                                                                                                       | Translation value Label                                                                                                                                                                                                                                                                                                                                                                                                                                                                                                                                     |
| 1              | evn_ordinary       | DEZE DAG WAS EEN GEWONE DAG                                         | This day was an ordinary day                                             | Likert scale                                                                                                                                                                                                                                                                                                                                                                                                                                                                                                                                                                                                                                                                                                                                                                                                                                                                                                                                                                                                                                                                                                      | Likert scale                                                                                                                                                                                                                                                                                                                                                                                                                                                                                                                                                |
| 2              | evn_niceday        | IK VOND DIT EEN LEUKE DAG                                           | I found this a nice day                                                  | Likert scale                                                                                                                                                                                                                                                                                                                                                                                                                                                                                                                                                                                                                                                                                                                                                                                                                                                                                                                                                                                                                                                                                                      | Likert scale                                                                                                                                                                                                                                                                                                                                                                                                                                                                                                                                                |
| 3              | evn_lifemood       | HET INVULLEN VAN HET APPARAATJE HEEFT MIJN STEMMING BEINVLOED.      | Responding to this pager influenced my mood                              | Likert scale                                                                                                                                                                                                                                                                                                                                                                                                                                                                                                                                                                                                                                                                                                                                                                                                                                                                                                                                                                                                                                                                                                      | Likert scale                                                                                                                                                                                                                                                                                                                                                                                                                                                                                                                                                |
| 4              | evn_pager          | ZONDER HET APPARAATJE ZOU IK VANDAAG ANDERE DINGEN HEBBEN GEDAAN    | Without the pager I would have done other things today                   | Likert scale                                                                                                                                                                                                                                                                                                                                                                                                                                                                                                                                                                                                                                                                                                                                                                                                                                                                                                                                                                                                                                                                                                      | Likert scale                                                                                                                                                                                                                                                                                                                                                                                                                                                                                                                                                |
| 5              | evn_work           | IK BEN VANDAAG GAAN WERKEN/STUDEREN                                 | I went to work/study today                                               | Likert scale                                                                                                                                                                                                                                                                                                                                                                                                                                                                                                                                                                                                                                                                                                                                                                                                                                                                                                                                                                                                                                                                                                      | Likert scale                                                                                                                                                                                                                                                                                                                                                                                                                                                                                                                                                |
| 6              | PM_Inf_thank       | BEDANKT                                                             | Thank you                                                                | Likert scale                                                                                                                                                                                                                                                                                                                                                                                                                                                                                                                                                                                                                                                                                                                                                                                                                                                                                                                                                                                                                                                                                                      | Likert scale                                                                                                                                                                                                                                                                                                                                                                                                                                                                                                                                                |
