# Supplementary material for: Vulnerability for new episodes in recurrent major depressive disorder: protocol for the longitudinal DELTA-neuroimaging cohort study
Source: PubMed Central journal article supplement — BMJ Open. 2016 Mar 1;6(3):e009510. doi: 10.1136/bmjopen-2015-009510 (PMC4785288; doi:10.1136/bmjopen-2015-009510), 2016-03-01
Supplement: bmjopen-2015-008721supp_table2.pdf [file bmjopen-2015-008721supp_table2.pdf]

Table S2: functional magnetic imaging scan task information according to the form containing the first items from Poldrack et al.'s checklist adapted by Guo et al.

| Category                                   | Item No | Item Description                                                                                                                           | Reinforcement learning task                                                                                                                            | Cued Emotional Conflict task                                                                                                                                             | Emotion regulation task                                                                                                                                                                                                                                                                                                                                                                                                                                   |
|--------------------------------------------|---------|--------------------------------------------------------------------------------------------------------------------------------------------|--------------------------------------------------------------------------------------------------------------------------------------------------------|--------------------------------------------------------------------------------------------------------------------------------------------------------------------------|-----------------------------------------------------------------------------------------------------------------------------------------------------------------------------------------------------------------------------------------------------------------------------------------------------------------------------------------------------------------------------------------------------------------------------------------------------------|
| EXPERIMENTAL DESIGN - design specification | 1a      | Describe number of blocks, trials, experimental units per session or per subject                                                           |                                                                                                                                                        | 6 blocks of 24 trials (max. durations=248s)                                                                                                                              | 24 'semi'-blocks of three similar trials: 3 attend sad, 3 attend fear, 3 attend happy, 3 attend neutral, 3 regulate sad, 3 regulate fear, 3 regulate happy, 3 regulate neutral blocks                                                                                                                                                                                                                                                                     |
|                                            | 1b      | State length of each trial and interval between trials                                                                                     |                                                                                                                                                        | Each trial started with a cue presented for 500 ms. After the presentation of the cue, a fixed interval of 2000ms separated the presentation of the cue from the target. | Each picture was presented for 10 s, followed by an 'ISI' of max. 6 seconds (during which subjects rated their feelings; this interval ended as soon as the subject had finished the rating, i.e. was self-paced). After every third picture, subjects also rated how well they managed to perform during the previous block (also max. 6 seconds, self-paced), followed by a 4-seconds inter-block interval during which a fixation cross was presented. |
|                                            | 1c      | If ISIs are variable, report the mean and range of ISIs and how they are distributed                                                       |                                                                                                                                                        | The inter-trial interval was jittered between 3500 and 5500 ms (in 500 ms steps).                                                                                        | See description above.                                                                                                                                                                                                                                                                                                                                                                                                                                    |
|                                            | 1d      | <i>Block-Designs</i> : specify the length of blocks                                                                                        |                                                                                                                                                        | NA                                                                                                                                                                       | Each 'semi'-block had a duration of min. 30 s and max. 54 s.                                                                                                                                                                                                                                                                                                                                                                                              |
|                                            | 1e      | <i>Event-related Designs</i> : state whether the design is optimized for efficiency, and if so, state how                                  |                                                                                                                                                        | Jittered inter-trial interval                                                                                                                                            |                                                                                                                                                                                                                                                                                                                                                                                                                                                           |
|                                            | 1f      | <i>Mixed designs</i> : state correlation between block and event regressors                                                                |                                                                                                                                                        | NA                                                                                                                                                                       |                                                                                                                                                                                                                                                                                                                                                                                                                                                           |
| EXPERIMENTAL DESIGN - task specification   | 2a      | Instructions: state what subjects are asked to do                                                                                          | See supplement                                                                                                                                         | See supplement                                                                                                                                                           | See supplement                                                                                                                                                                                                                                                                                                                                                                                                                                            |
|                                            | 2b      | Stimuli: describe what the Stimuli are and how many there are                                                                              | What: see supplement; How many:                                                                                                                        | What: see supplement; How many: 12 for each cue per block                                                                                                                | See supplement                                                                                                                                                                                                                                                                                                                                                                                                                                            |
|                                            | 2c      | Stimuli: state whether specific stimuli repeated across trials                                                                             | See supplement                                                                                                                                         | See supplement                                                                                                                                                           | See supplement                                                                                                                                                                                                                                                                                                                                                                                                                                            |
| EXPERIMENTAL DESIGN - planned comparison   | 3       | If the experiment has multiple conditions, state what the specific planned comparisons are, or whether an omnibus ANOVA test is used       |                                                                                                                                                        | Full factorial ANOVA, and opposite-sad vs. actual-sad, opposite-happy vs. actual-happy, and opposite-sad vs. opposite-happy contrasts.                                   | Full factorial ANOVA                                                                                                                                                                                                                                                                                                                                                                                                                                      |
| HUMAN SUBJECTS - ethics approval           | 5       | State which Institutional Review Board (IRB) approved the protocol                                                                         | See main text                                                                                                                                          | See main text                                                                                                                                                            | See main text                                                                                                                                                                                                                                                                                                                                                                                                                                             |
| HUMAN SUBJECTS - behavioral performance    | 6       | State how behavioral performance was measured (e.g., response time, accuracy)                                                              | Intensity-, wanting- and liking-ratings for both tastes on a visual analogue scale directly before and after the task                                  | Response time and accuracy for face label assignments.                                                                                                                   | See supplement                                                                                                                                                                                                                                                                                                                                                                                                                                            |
| DATA ACQUISITION - image properties        | 7a      | Describe manufacturer, field strength (in Tesla), model name                                                                               | See main text                                                                                                                                          | See main text                                                                                                                                                            | See main text                                                                                                                                                                                                                                                                                                                                                                                                                                             |
|                                            | 7b      | State the number of experimental sessions and volumes acquired per session                                                                 | Number of dynamics=1125                                                                                                                                | Six sessions with max. number of dynamics=120                                                                                                                            | Two sessions with max. number of dynamics=407                                                                                                                                                                                                                                                                                                                                                                                                             |
|                                            | 7c      | State pulse sequence type (gradient/spin echo, EPI/spiral)                                                                                 | EPI                                                                                                                                                    | EPI                                                                                                                                                                      | EPI                                                                                                                                                                                                                                                                                                                                                                                                                                                       |
|                                            | 7d      | State field of view, matrix size, slice thickness, inter-slice skip                                                                        | FOV=240×240×82.2mm; slice thickness=3mm; act. slice gap=0.3mm; acquired matrix=80×80                                                                   | FOV=240×240×121.8mm; slice thickness=3mm; act. slice gap=0.3mm; acquired matrix=80×80                                                                                    | FOV=240×240×121.8mm; slice thickness=3mm; act. slice gap=0.3mm; acquired matrix=80×80                                                                                                                                                                                                                                                                                                                                                                     |
|                                            | 7e      | State acquisition orientation (axial, sagittal, coronal, oblique; if axials co-planar with AC-PC, the volume coverage in terms of Z in mm) | Slice orientation=transverse/axial                                                                                                                     | Slice orientation=transverse/axial                                                                                                                                       | Slice orientation=transverse/axial                                                                                                                                                                                                                                                                                                                                                                                                                        |
|                                            | 7f      | State clearly whether it is on the whole brain. If not, state area of acquisition                                                          | Angulated field of view from lower edge pons and lower end prefrontal cortex, 25 slices up to usually the top of the dorsal anterior cingulate cortex. | Whole brain, 37 slices.                                                                                                                                                  | Whole brain, 37 slices.                                                                                                                                                                                                                                                                                                                                                                                                                                   |
|                                            | 7g      | State order of acquisition of slices (sequential or interleaved)                                                                           | Sequential, ascending                                                                                                                                  | Sequential, ascending                                                                                                                                                    | Sequential, ascending                                                                                                                                                                                                                                                                                                                                                                                                                                     |
|                                            | 7h      | State TE, TR, flip angle                                                                                                                   | TE=28ms; TR=1500ms; FA=70°                                                                                                                             | TE=28ms; TR=2000ms; FA=76°                                                                                                                                               | TE=28ms; TR=2000ms; FA=76°                                                                                                                                                                                                                                                                                                                                                                                                                                |

Items 4 and >7 are not applicable because the present manuscript described the study protocol.

Abbreviations: ISIs, inter-stimulus intervals; ANOVA, analysis of variance; EPI, Echo Planar Imaging; FOV, field of view; TE, echo time; TR, repetition time; MRI, magnetic resonance imaging; MNI, Montreal Neurological Institute space; DCT, discrete cosine transform; CC, cubic centimeter; FWE, family-wise error; impulse response FDR, false discovery rate; FWHM, full-width at half-maximum; RESEL, resolution element; ROI, region of interest; FIR, finite
